# Supplementary material
Source: HighWire-hosted journal article supplement (https://www.annfammed.org/highwire/filestream/9010/field_highwire_adjunct_files/0/Papadakis_Supp_Apps.pdf)

**Supplemental materials for:**

**Papadakis S, Cole AG, Reid RD, et al. From good to great: the role of performance coaching in enhancing tobacco-dependence treatment rates. *Ann Fam Med*. 2018;16(6):498-506.**

| Supplemental Table 1: Practice and clinician characteristics according to study randomization group |                                |             |              |              |
|-----------------------------------------------------------------------------------------------------|--------------------------------|-------------|--------------|--------------|
| Parameter                                                                                           | Response                       | OMSC Group  | OMSC + Group | Overall      |
| <b>Practice-level</b>                                                                               |                                | <b>k=7</b>  | <b>k=8</b>   | <b>k=15</b>  |
| Geographic location                                                                                 | Urban                          | 28.6        | 25.0         | 26.7         |
|                                                                                                     | Suburban                       | 42.9        | 12.5         | 26.7         |
|                                                                                                     | Rural                          | 28.6        | 62.5         | 46.7         |
| Number of Clinicians                                                                                | < 10 clinicians                | 28.6        | 25.0         | 26.7         |
|                                                                                                     | ≥ 10 clinicians                | 71.4        | 75.0         | 73.3         |
| Access to cost-free NRT                                                                             | No                             | 14.3        | 25.0         | 20.00        |
|                                                                                                     | Yes, post intervention only    | 14.3        | 25.0         | 20.0         |
|                                                                                                     | Yes, pre and post intervention | 71.4        | 50.0         | 60.0         |
| <b>Clinician-level</b>                                                                              |                                | <b>k=76</b> | <b>k=90</b>  | <b>k=166</b> |
| Health discipline of provider                                                                       | Physician                      | 79.0        | 75.6         | 77.11        |
|                                                                                                     | Nurse Practitioner             | 5.3         | 6.7          | 6.02         |
|                                                                                                     | Nurse                          | 0.0         | 1.1          | 0.60         |
|                                                                                                     | Medical Resident               | 6.6         | 0.0          | 3.01         |
|                                                                                                     | <i>Not stated</i>              | 9.2         | 16.7         | 13.25        |
| Sex                                                                                                 | Female                         | 38.2        | 41.1         | 39.76        |
|                                                                                                     | Male                           | 46.1        | 36.7         | 41.0         |
|                                                                                                     | <i>Not stated</i>              | 15.8        | 22.2         | 19.3         |
| Age                                                                                                 | < 30 years                     | 7.9         | 2.2          | 4.82         |
|                                                                                                     | 30-39 years                    | 26.3        | 22.2         | 24.1         |
|                                                                                                     | 40-49 years                    | 11.8        | 22.2         | 17.5         |
|                                                                                                     | 50-59 years                    | 25.0        | 23.3         | 24.1         |
|                                                                                                     | 60-69 years                    | 13.2        | 6.7          | 9.6          |
|                                                                                                     | ≥ 70 years                     | 1.3         | 1.1          | 1.2          |
|                                                                                                     | <i>Not stated</i>              | 14.5        | 22.2         | 18.7         |
| Previous smoking cessation training                                                                 | No                             | 54.0        | 51.1         | 52.1         |

| <b>Supplemental Table 2: Patient demographic characteristics according to study randomization for the pre-and post-assessment samples</b> |                                    |                            |                         |                             |                        |
|-------------------------------------------------------------------------------------------------------------------------------------------|------------------------------------|----------------------------|-------------------------|-----------------------------|------------------------|
| <b>Variable</b>                                                                                                                           | <b>Response</b>                    | <b>Pre-assessment (T1)</b> |                         | <b>Post-assessment (T2)</b> |                        |
|                                                                                                                                           |                                    | <b>OMSC<br/>n=541</b>      | <b>OMSC +<br/>n=583</b> | <b>OMSC<br/>n=397</b>       | <b>OMSC+<br/>n=475</b> |
| Age                                                                                                                                       | 18-24 years                        | 8.3                        | 6.4                     | 6.1                         | 5.1                    |
|                                                                                                                                           | 25-39 years                        | 24.2                       | 20.8                    | 23.4                        | 19.2                   |
|                                                                                                                                           | 40-54 years                        | 31.4                       | 39.3                    | 37.5                        | 41.9                   |
|                                                                                                                                           | 55-64 years                        | 26.1                       | 22.47                   | 22.9                        | 21.1                   |
|                                                                                                                                           | ≥65 years                          | 10.0                       | 11.2                    | 10.1                        | 12.8                   |
| Sex                                                                                                                                       | % Male                             | 43.4                       | 42.1                    | 42.3                        | 38.5                   |
| Years of formal education                                                                                                                 | < High school                      | 3.3                        | 3.5                     | 2.4                         | 2.6                    |
|                                                                                                                                           | High school                        | 52.7                       | 54.0                    | 51.1                        | 53.0                   |
|                                                                                                                                           | University                         | 38.2                       | 39.2                    | 41.2                        | 40.6                   |
|                                                                                                                                           | Graduate school                    | 5.8                        | 3.3                     | 5.4                         | 3.8                    |
| # Cigarettes/day                                                                                                                          | <15                                | 416                        | 34.5                    | 44.3                        | 37.3                   |
|                                                                                                                                           | 15-25                              | 50.1                       | 55.8                    | 49.1                        | 55.4                   |
|                                                                                                                                           | >25                                | 8.3                        | 9.8                     | 6.6                         | 7.4                    |
| Time to first cigarette                                                                                                                   | >30 minutes                        | 34.4                       | 35.1                    | 36.87                       | 33.7                   |
|                                                                                                                                           | <30 minutes                        | 65.6                       | 64.9                    | 63.1                        | 66.3                   |
| # Years smoked                                                                                                                            | 0-2 years                          | 1.5                        | 2.06                    | 2.5                         | 2.1                    |
|                                                                                                                                           | 3-9 years                          | 9.6                        | 8.2                     | 8.3                         | 8.8                    |
|                                                                                                                                           | 10-19 years                        | 19.4                       | 16.3                    | 16.9                        | 16.6                   |
|                                                                                                                                           | 20+ years                          | 69.5                       | 73.4                    | 72.3                        | 72.4                   |
| Readiness to quit <sup>a</sup>                                                                                                            | Ready to quit in the next 30 days  | 24.8                       | 27.4                    | 23.9                        | 31.4                   |
|                                                                                                                                           | Ready to quit in the next 6-months | 46.4                       | 41.9                    | 44.6                        | 37.9                   |
|                                                                                                                                           | Not ready to quit in next 6-months | 28.8                       | 30.7                    | 31.5                        | 30.7                   |
| Self-efficacy <sup>b</sup>                                                                                                                | Low                                | 80.1                       | 79.28                   | 76.6                        | 76.4                   |
|                                                                                                                                           | High                               | 19.9                       | 20.7                    | 23.5                        | 23.6                   |
| Medical History                                                                                                                           | Smoking-related illness            | 24.8                       | 26.9                    | 22.9                        | 24.0                   |
|                                                                                                                                           | Anxiety/Depression                 | 44.9                       | 50.6                    | 42.1                        | 51.0                   |
| Purpose of visit                                                                                                                          | Follow-up appointment              | 79.3                       | 76.9                    | 80.6                        | 76.9                   |
|                                                                                                                                           | Annual exam/health review          | 20.7                       | 23.2                    | 19.5                        | 23.1                   |

---

<sup>a</sup>Which of the following best describes your feelings about smoking right now?  
(responses: 1=ready to quit in next 30 days, 0= ready to quit in next 6 months or not ready to quit)

<sup>b</sup>On a scale of 1 to 10 how confident are you that you would be able to quit smoking at this time? (1=not at all confident, 10=extremely confident)

---

**Supplemental Table 3: Sensitivity analysis examining effect of exposure to the performance coaching intervention on rates of tobacco treatment delivery, quit rates and cessation outcomes at the post-intervention assessment**

| <b>Parameter</b>                  | <b>% Not Exposed to Performance Coaching<br/>n=506</b> | <b>% Exposed to Performance Coaching<br/>n=366</b> | <b>% Delta</b> | <b>OR (95%CI)<sup>a</sup></b> | <b>p-value<sup>b</sup></b> |
|-----------------------------------|--------------------------------------------------------|----------------------------------------------------|----------------|-------------------------------|----------------------------|
| Ask                               | 57.5                                                   | 66.4                                               | +8.9           | 1.51 (1.01, 2.26)             | 0.04                       |
| Advise                            | 47.0                                                   | 56.6                                               | +9.5           | 1.65 (1.10, 2.49)             | 0.02                       |
| Assist                            | 43.9                                                   | 55.74                                              | +11.9          | 1.50 (1.03, 2.19)             | 0.04                       |
| Assist – Quit Plan Visit          | 19.4                                                   | 27.1                                               | +7.7           | 1.41 (0.96, 2.09)             | 0.08                       |
| Assist – Self-help Materials      | 12.5                                                   | 20.0                                               | +7.5           | 1.54 (0.93, 2.55)             | 0.09                       |
| Assist – Discuss Medications      | 28.1                                                   | 38.5                                               | +10.5          | 1.60 (1.10, 2.32)             | 0.02                       |
| Assist – Prescribe Medications    | 9.5                                                    | 12.3                                               | +2.8           | 1.27 (0.76, 2.13)             | 0.35                       |
| Arrange                           | 25.9                                                   | 37.2                                               | +11.3          | 1.41 (0.99, 2.01)             | 0.06                       |
| Quit attempt                      | 32.4                                                   | 33.1                                               | +0.7           | 1.08 (0.76, 1.52)             | 0.67                       |
| 7-day Point prevalence Abstinence | 8.1                                                    | 7.1                                                | -1.0           | 0.94 (0.53, 1.67)             | 0.82                       |
| Continuous abstinence             | 5.9                                                    | 5.2                                                | -0.7           | 0.94 (0.47, 1.91)             | 0.87                       |

<sup>a</sup>Controlling for clinic level variance between clusters, patient gender, patient education, and self-reported anxiety/depression; based on inclusion of 15 clinics, unless otherwise indicated.

<sup>b</sup>p-value based on Wald statistic.

CI = confidence interval.

**Supplemental Table 4: Final model for the multi-level analysis of clinic-, clinician-, and patient-level characteristics associated with rates of ask, advise, assist and arrange**

| Parameter                                                                     | Response | AOR (95% CI)  |              |              |               |              |                |               |              |
|-------------------------------------------------------------------------------|----------|---------------|--------------|--------------|---------------|--------------|----------------|---------------|--------------|
|                                                                               |          | Ask           | Advise       | Assist       | Arrange       | Quit Date    | Materials      | Medication    | Prescribe    |
| Intervention                                                                  | OMS      | 1.00          | 1.00         | 1.00         | 1.00          | 1.00         | 1.00           | 1.00          | 1.00         |
|                                                                               | C        |               |              |              |               |              |                |               |              |
|                                                                               | OMS      | 1.42          | 1.24         | 1.62         | 1.92          | 1.57         | 2.06           | 1.64          | 1.18         |
|                                                                               | C+       | (0.99, 2.02)  | (0.68, 2.28) | (1.02, 2.56) | (1.17, 3.15)* | (0.93, 2.66) | (1.35, 3.12)** | (1.04, 2.58)* | (0.72, 1.94) |
|                                                                               |          |               |              | *            |               |              | *              |               |              |
| <b>Clinician characteristics</b>                                              |          |               |              |              |               |              |                |               |              |
| Smoking cessation is an important part of my role as a clinician <sup>a</sup> | Disagree | 1.00          |              |              |               |              |                |               |              |
|                                                                               | Agree    | 4.36          |              |              |               |              |                |               |              |
|                                                                               |          | (2.05, 9.29)* |              |              |               |              |                |               |              |
|                                                                               |          | **            |              |              |               |              |                |               |              |
| <b>Patient characteristics</b>                                                |          |               |              |              |               |              |                |               |              |
| Gender                                                                        | Female   | 1.00          |              |              |               |              | 1.00           | 1.00          |              |
|                                                                               | Male     | 2.09          |              |              |               |              | 1.54           | 1.46          |              |
|                                                                               |          | (1.49, 2.92)* |              |              |               |              | (1.03, 2.29)*  | (1.04, 2.04)* |              |

|                                                        |             |                        |                      |                        |                         |                        |                         |                        |
|--------------------------------------------------------|-------------|------------------------|----------------------|------------------------|-------------------------|------------------------|-------------------------|------------------------|
|                                                        |             | **                     |                      |                        |                         |                        |                         |                        |
| #                                                      | <15         | 1.00                   |                      |                        |                         |                        |                         |                        |
| cigs/day                                               | 15-25       | 1.46<br>(0.87, 2.44)   |                      |                        |                         |                        |                         |                        |
|                                                        | >25         | 3.26<br>(1.47, 7.26)** |                      |                        |                         |                        |                         |                        |
| # years smoked                                         | 20+ years   | 1.00                   | 1.00                 | 1.00                   |                         |                        |                         |                        |
|                                                        | 10-19 years | 0.85<br>(0.55, 1.32)   | 0.78<br>(0.51, 1.18) | 1.05<br>(0.68, 1.64)   |                         |                        |                         |                        |
|                                                        | 3-9 years   | 0.49<br>(0.27, 0.88)   | 0.44<br>(0.25, 0.79) | 0.53<br>(0.28, 1.01)   |                         |                        |                         |                        |
|                                                        |             | *                      | **                   |                        |                         |                        |                         |                        |
|                                                        | 0-2 years   | 0.75<br>(0.23, 2.44)   | 0.58<br>(0.19, 1.73) | 0.14<br>(0.03, 0.68)*  |                         |                        |                         |                        |
| Ready to quit smoking in the next 30 days <sup>b</sup> | No          | 1.00                   | 1.00                 | 1.0                    | 1.00                    | 1.00                   | 1.00                    | 1.00                   |
|                                                        | Yes         | 1.52<br>(1.04, 2.24)*  | 2.04<br>(1.40, 2.99) | 2.11<br>(1.47, 3.04)   | 2.52<br>(1.69, 3.77)*** | 4.24<br>(2.83, 6.36)** | 2.30<br>(1.58, 3.35)*** | 2.63<br>(1.60, 4.30)** |
|                                                        |             | ***                    | ***                  |                        |                         | *                      |                         | *                      |
| Self-efficacy to quit smoking <sup>c</sup>             | Low         | 1.00                   | 1.00                 | 1.0                    | 1.0                     |                        |                         |                        |
|                                                        | High        | 1.69<br>(1.12, 2.55)   | 1.59<br>(1.08, 2.35) | 1.87<br>(1.23, 2.86)** | 1.86<br>(1.22, 2.85)**  |                        |                         |                        |
|                                                        |             | *                      | *                    |                        | 1.54<br>(1.03, 2.29)*   |                        |                         |                        |
|                                                        |             |                        |                      |                        | 2.54<br>(1.54, 4.20)**  |                        |                         |                        |
|                                                        |             |                        |                      |                        | *                       |                        |                         |                        |

|                                       |     |                             |
|---------------------------------------|-----|-----------------------------|
| Presence of a smoking-related illness | No  | 1.00                        |
|                                       | Yes | 2.19<br>(1.47, 3.27)<br>*** |

### ***Other Factors***

|                  |                                    |                             |                             |                            |                         |
|------------------|------------------------------------|-----------------------------|-----------------------------|----------------------------|-------------------------|
| Purpose of visit | Follow-up/other                    | 1.00                        | 1.00                        | 1.00                       | 1.00                    |
|                  | Annual exam /1 <sup>st</sup> visit | 2.28<br>(1.49, 3.48)*<br>** | 2.02<br>(1.34, 3.04)<br>*** | 1.89<br>(1.29, 2.79)<br>** | 2.03<br>(1.37, 3.01)*** |

### ***Random***

|           |                  |                  |                  |                  |                  |   |                  |                  |
|-----------|------------------|------------------|------------------|------------------|------------------|---|------------------|------------------|
| Clinic    | 0.017<br>(0.042) | 0.173<br>(0.132) | 0.060<br>(0.072) | 0.060<br>(0.082) | 0.070<br>(0.099) | ^ | 0.037<br>(0.069) | 0.004<br>(0.074) |
| Clinician | ^                | 0.537<br>(0.215) | 0.332<br>(0.157) | 0.157<br>(0.180) | 0.200<br>(0.198) | ^ | 0.326<br>(0.200) | ^                |

\* p<0.05 \*\* p<0.01 \*\*\* p<0.001

AOR: Adjust Odds Ratio; 95%CI: 95% Confidence Interval

^ The estimated G matrix was not positive definite, so clinic- and/or provider-level variance was not included in this model

Final Model Ask: 15 clinics, 104 clinicians; 1=Asked about smoking (n=470), 0=Not asked about smoking (n=259)

Final Model Advise: 15 clinics, 132 clinicians; 1=Advised about smoking (n=408), 0=Not advised about smoking (n=392)

Final Model Assist: 15 clinics, 132 clinicians; 1=Assisted with quitting smoking (n=391), 0=Not assisted with quitting smoking (n=409)



Final Model Arrange: 15 clinics, 132 clinicians; 1=Arranged follow-up appointment (n=154), 0=Not arrange a follow-up appointment (n=650)

Final Model Quit Date: 15 clinics, 135 clinicians; 1=Set a quit date (n=137), 0=Did not set a quit date (n=735)

Final Model Materials: 15 clinics, 131 clinicians; 1=Provided self-help materials (n=124), 0=Did not provide self-help materials (n=672)

Final Model Medication: 15 clinics, 131 clinicians; 1=Discussed medications (n=259), 0=Did not discuss medications (n=533)

Final Model Prescribe: 15 clinics, 132 clinicians; 1=Prescribed medications (n=86), 0=Did not prescribe medications (n=718)

<sup>a</sup> Smoking cessation is an important part of my role as a clinician? (response: 5-point Likert scale where 5=strongly agree, 1=strongly disagree).

<sup>b</sup> Which of the following best describes your feelings about smoking right now? (responses: 1=ready to quit in next 30 days, 0= ready to quit in next 6 months or not ready to quit)

<sup>c</sup> On a scale of 1 to 10 how confident are you that you would be able to quit smoking at this time? (response 1=not at all confident, 10=extremely confident)

**Supplemental Table 5: Final model for the multi-level analysis of clinic-, clinician-, and patient-level characteristics associated with cessation outcomes at the six-month follow-up**

| Parameter                             | Response        | AOR (95% CI)      |                        |                               |
|---------------------------------------|-----------------|-------------------|------------------------|-------------------------------|
|                                       |                 | Quit attempts     | 7-day point prevalence | 12-week continuous abstinence |
| Time                                  | Pre-assessment  | 1.00              | 1.00                   | 1.00                          |
|                                       | Post-assessment | 1.19 (0.97, 1.46) | 1.44 (0.97, 2.14)      | 1.35 (0.86, 2.13)             |
| Intervention                          | OMSC            | 1.00              | 1.00                   | 1.00                          |
|                                       | OMSC+           | 1.00 (0.82, 1.23) | 0.88 (0.53, 1.48)      | 0.77 (0.47, 1.28)             |
| <b><i>Patient characteristics</i></b> |                 |                   |                        |                               |
| Age                                   | 18-24 years     |                   | 1.00                   |                               |
|                                       | 25-39 years     |                   | 0.57 (0.27,            |                               |

|                                                 |             |                         |                                 |                         |
|-------------------------------------------------|-------------|-------------------------|---------------------------------|-------------------------|
|                                                 | 40-54 years |                         | 1.20)<br>0.29 (0.14,<br>0.63)** |                         |
|                                                 | 55-64 years |                         | 0.66 (0.31,<br>1.39)            |                         |
|                                                 | >65 years   |                         | 0.85 (0.38,<br>1.90)            |                         |
| # cigs/day                                      | <15         | 1.00                    | 1.00                            | 1.00                    |
|                                                 | 15-25       | 0.88 (0.71,<br>1.10)    | 0.69 (0.46,<br>1.03)            | 0.60 (0.38, 0.95)*      |
|                                                 | >25         | 0.59 (0.38,<br>0.92)*   | 0.34 (0.12,<br>0.99)*           | 0.32 (0.09, 1.07)       |
| Time to first<br>cigarette                      | >30 minutes | 1.00                    |                                 |                         |
|                                                 | <30 minutes | 0.69 (0.55,<br>0.86)*** |                                 |                         |
| # years smoked                                  | 20+ years   | 1.00                    |                                 | 1.00                    |
|                                                 | 10-19 years | 1.12 (0.85,<br>1.48)    |                                 | 0.83 (0.45, 1.55)       |
|                                                 | 3-9 years   | 1.74 (1.23,<br>2.46)**  |                                 | 1.01 (0.46, 2.21)       |
|                                                 | 0-2 years   | 1.00 (0.50,<br>2.02)    |                                 | 2.87 (1.07, 7.72)*      |
| Ready to quit<br>smoking in the<br>next 30 days | No          | 1.00                    | 1.00                            | 1.00                    |
|                                                 | Yes         | 2.52 (2.02,<br>3.13)*** | 2.31 (1.52,<br>3.51)***         | 2.07 (1.29,<br>3.35)**  |
| Self-efficacy to<br>quit smoking                | Low         |                         | 1.00                            | 1.00                    |
|                                                 | High        |                         | 2.22 (1.47,<br>3.36)***         | 2.54 (1.58,<br>4.11)*** |
| Presence of a<br>smoking-related                | No          | 1.00                    |                                 |                         |
|                                                 | Yes         | 1.32 (1.04,             |                                 |                         |

|                                                                                                                                                                                                                                                                                                                                                                                                                                                                                                                                                                                                                                                                                                                   |           |                      |                      |                      |
|-------------------------------------------------------------------------------------------------------------------------------------------------------------------------------------------------------------------------------------------------------------------------------------------------------------------------------------------------------------------------------------------------------------------------------------------------------------------------------------------------------------------------------------------------------------------------------------------------------------------------------------------------------------------------------------------------------------------|-----------|----------------------|----------------------|----------------------|
| illness                                                                                                                                                                                                                                                                                                                                                                                                                                                                                                                                                                                                                                                                                                           |           | 1.67)*               |                      |                      |
| Presence of anxiety/depression                                                                                                                                                                                                                                                                                                                                                                                                                                                                                                                                                                                                                                                                                    | No        | 1.00                 | 1.00                 | 1.00                 |
|                                                                                                                                                                                                                                                                                                                                                                                                                                                                                                                                                                                                                                                                                                                   | Yes       | 1.25 (1.01, 1.55)*   | 0.55 (0.36, 0.83)**  | 0.43 (0.25, 0.75)**  |
| Presence of mental illness                                                                                                                                                                                                                                                                                                                                                                                                                                                                                                                                                                                                                                                                                        | No        | 1.00                 |                      | 1.00                 |
|                                                                                                                                                                                                                                                                                                                                                                                                                                                                                                                                                                                                                                                                                                                   | Yes       | 0.62 (0.44, 0.85)**  |                      | 2.26 (1.12, 4.54)*   |
| Clinician created a quit plan with the patient                                                                                                                                                                                                                                                                                                                                                                                                                                                                                                                                                                                                                                                                    | No        | 1.00                 | 1.00                 | 1.00                 |
|                                                                                                                                                                                                                                                                                                                                                                                                                                                                                                                                                                                                                                                                                                                   | Yes       | 2.02 (1.59, 2.56)*** | 2.33 (1.53, 3.56)*** | 2.39 (1.48, 3.85)*** |
| <b>Random</b>                                                                                                                                                                                                                                                                                                                                                                                                                                                                                                                                                                                                                                                                                                     |           |                      |                      |                      |
|                                                                                                                                                                                                                                                                                                                                                                                                                                                                                                                                                                                                                                                                                                                   | Clinic    | ^                    | 0.096 (0.092)        | 0.049 (0.095)        |
|                                                                                                                                                                                                                                                                                                                                                                                                                                                                                                                                                                                                                                                                                                                   | Clinician | ^                    | ^                    | ^                    |
| <p>* p&lt;0.05 ** p&lt;0.01 *** p&lt;0.001</p> <p>AOR: Adjust Odds Ratio; 95%CI: 95% Confidence Interval</p> <p>^ The estimated G matrix was not positive definite, so clinic- and/or provider-level variance was not included in this model</p> <p>Final Model Quit Attempt: 15 clinics, 166 clinicians; 1=Made a quit attempt (n=602), 0=Did not make a quit attempt (n=1387)</p> <p>Final Model 7-day point prevalence: 15 clinics, 166 clinicians; 1=Did not smoke over the last 7 days (n=121), 0=Smoked in the last 7 days (n=1761)</p> <p>Final Model 12-week continuous abstinence: 15 clinics, 166 clinicians; 1=Did not smoke over the last 12 weeks (n=90), 0=Smoked in the last 12 weeks (n=1792)</p> |           |                      |                      |                      |

### Supplemental Figure 1: CONSORT Flow Diagram

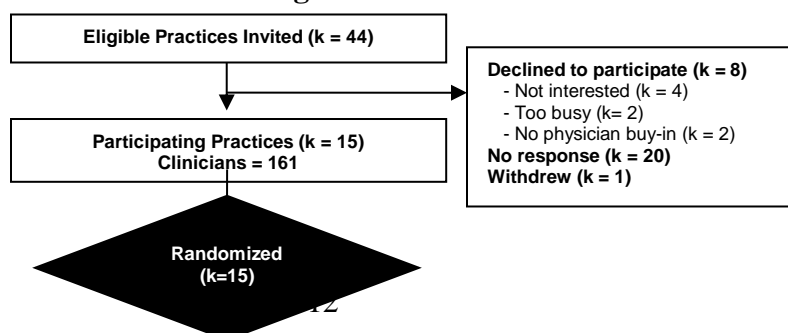

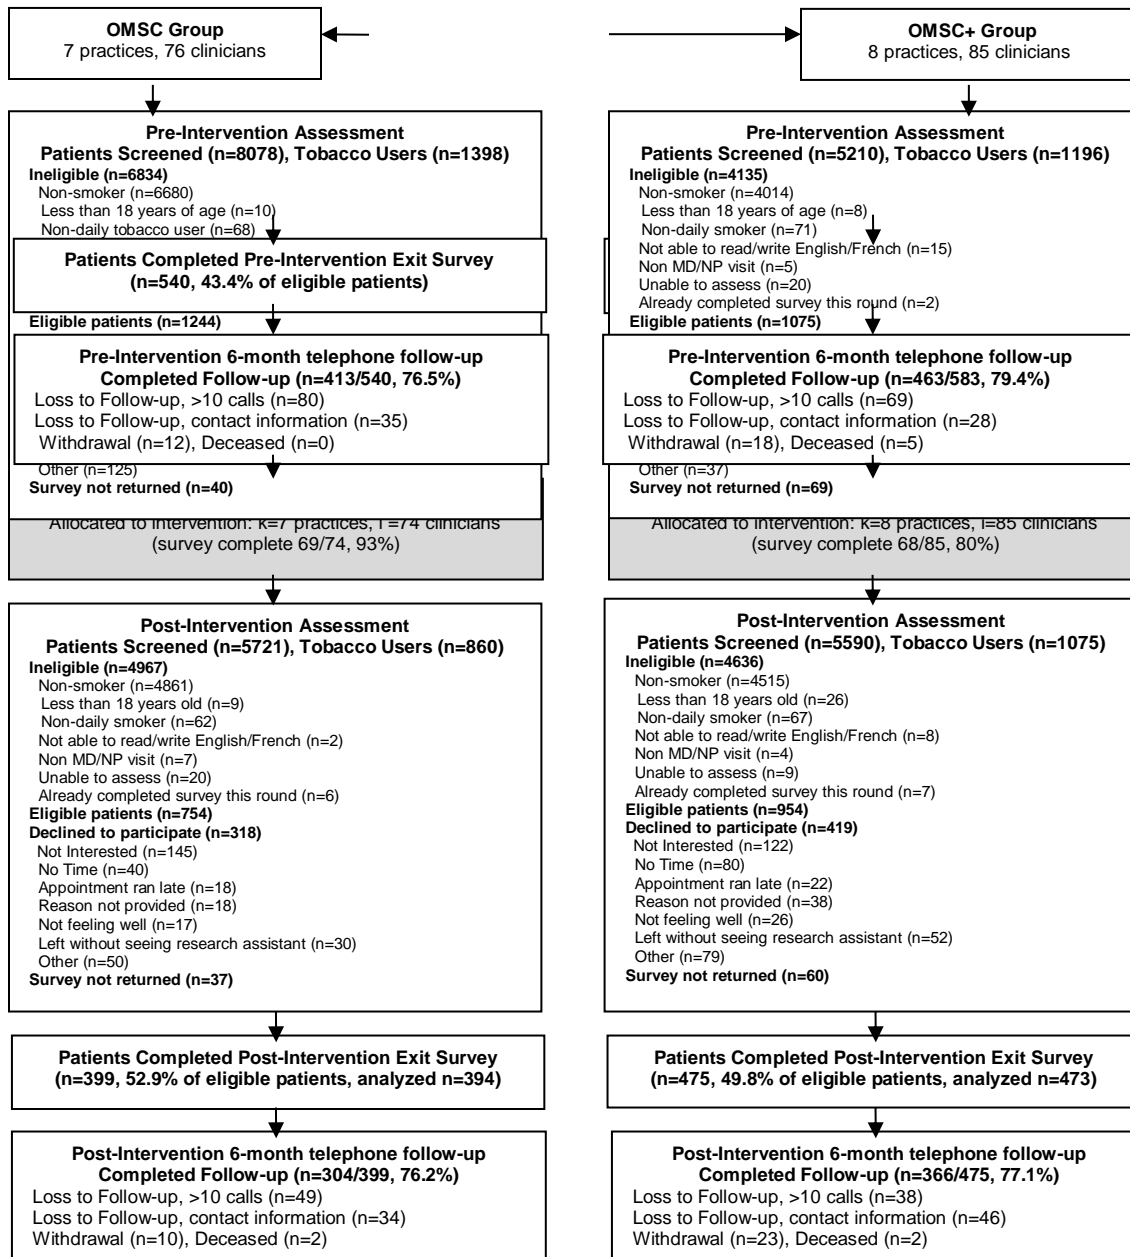

Supplement: Papadakis_Supp_Apps.pdf [file Papadakis_Supp_Apps.pdf]
